# Supplementary material
Source: PubMed Central journal article supplement (PMC6038702)

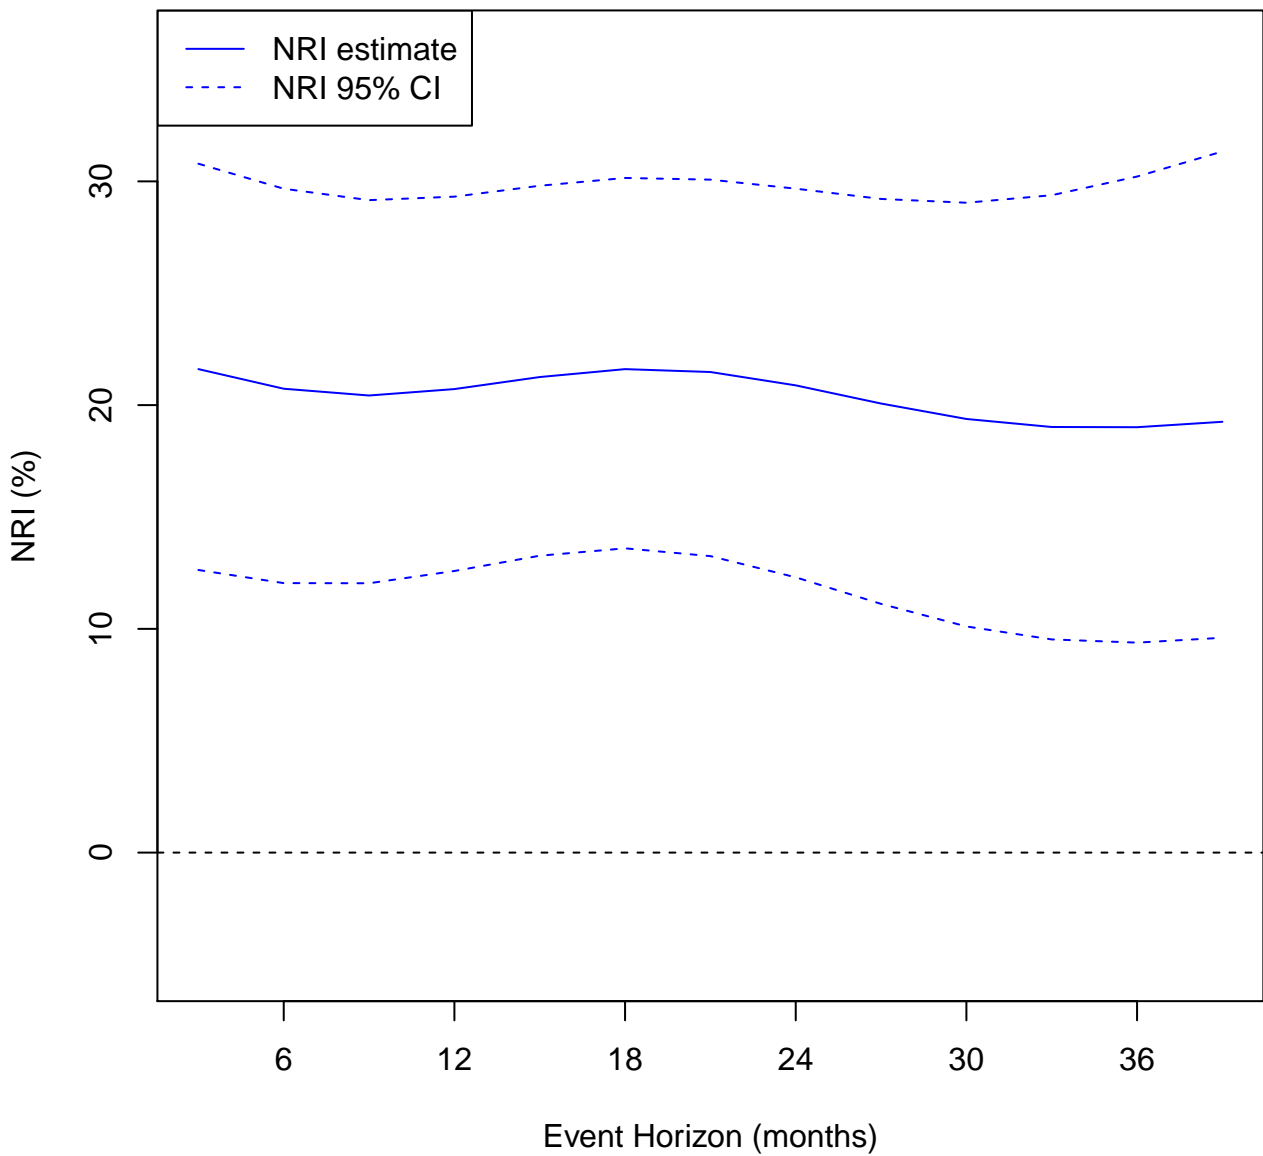

Supplement: NIHMS977108-supplement-Supp_Figure.pdf [file NIHMS977108-supplement-Supp_Figure.pdf]
